# Supplementary material for: Mapping of biodiversity hubs and key ecosystem services as a tool for shaping optimal areas for conservation
Source: PLoS One. 2021 Aug 17;16(8):e0253151. doi: 10.1371/journal.pone.0253151 (PMC8370615; doi:10.1371/journal.pone.0253151)
Supplement: S1 Appendix — (XLS) [file pone.0253151.s001.xls]

## Sheet: Mammal
				Status		Eastern Province							Northern Province					Southern Province								Western Province							City of Kigali
						Bugesera	Gatsibo	Kayonza	Kirehe	Ngoma	Nyagatare	Rwamagana	Burera	Gakenke	Gicumbi	Musanze	Rulindo	Gisagara	Huye	Kamonyi	Muhanga	Nyamagabe	Nyanza	Nyaruguru	Ruhango	Karongi	Ngororero	Nyabihu	Nyamasheke	Rubavu	Rusizi	Rutsiro	Kicukiro	Gasabo	Nyarugenge
	Scientific name	English name	Local name	IUCN	CITES	N: 142; CE: 6; E: 32, VU: 5, CITES: 5
1	Aepyceros melampus	Impala	Impala	E			1	1			1
2	Anomalurus derbianus	Lord Derby's Anomalure																				1		1		1			1		1
3	Aonyx congicus	Congo Clawless Otter																				1		1		1			1		1
4	Atherurus africanus	Brush-tailed porcupine																				1		1		1			1		1
5	Atilax paludinosus	Marsh Mongoose																				1		1		1			1		1
6	Canidae	Canids																									1					1
7	Canis adustus	Side-striped Jackal	Ingunzu										1			1						1		1		1		1	1	1	1
8	Canis mesomelas	Black-backed jackal							1																		1					1
9	Cephalophus nigrifrons	Black fronted duiker	Ifumberi	E			1	1			1		1			1					1	1		1		1		1		1	1
10	Cephalophus silvicultor	Yellow-backed duiker			CITES		1	1	1		1											1		1		1			1		1
11	Cephalophus weynsi	Weyn's duiker					1	1			1											1		1		1			1		1
12	Cercopithecus aethiops	Vervet monkey					1	1			1											1		1		1			1		1
13	Cercopithecus ascanius	Redtail monkey	Umukunga	E																		1		1		1			1		1
14	Cercopithecus hamlyni	Owl-faced monkey	Igihinyage	E																		1		1		1			1		1
15	Cercopithecus l'hoesti	L'hoest's monkey	Icyondi	E	CITES																	1		1		1	1	1	1		1	1
16	Cercopithecus mitis	Blue monkey					1	1			1										1	1		1		1			1		1
17	Cercopithecus mitis doggetti	Silver monkey	Inkima	VU	CITES				1												1	1		1		1	1	1	1	1	1	1
18	Cercopithecus mitis kandtii	Golden Monkey	Inkima	E									1			1											1	1		1		1
19	Cercopithecus mona	Mona's monkey	Umukunga	E																		1		1		1			1		1
20	Chlorocebus aethiops	Grivet Monkey				1			1	1													1
21	Chrysochloris stuhlmanni	Stuhlmann's golden mole																				1		1		1			1		1
22	Civettictis civetta	African Civet																				1		1		1			1		1
23	Colobus angolensis angolensis	Angolan colobus	Inkomo, Imbeya	E																		1		1		1			1		1
24	Colomys goslingi	Velvet Rat																				1		1		1			1		1
25	Cricetomys gambianus	Forest Pouched Rat																				1		1		1			1		1
26	Cricetomys gambianus (isiha)																									1
27	Crocidura lanosa	Musk Shrew		E																		1		1		1			1		1
28	Crocidura maurisca	Gracile Naked-tailed Shrew																				1		1		1			1		1
29	Crocidura nigrofusca	Musk Shrew																				1		1		1			1		1
30	Crocidura occidentalis																					1		1		1			1		1
31	Crocodylus niloticus	Crocodile					1	1			1
32	Crocuta crocuta	Spotted hyena					1	1			1
33	Damaliscus korrigum	Topi	Inyemera	E			1	1			1
34	Delanymys brooksi	Delany's Mouse		E																		1		1		1			1		1
35	Dendrohyrax arboreus	Southern Tree Hyrax							1
36	Dendrohyrax dorsalis	Western Tree Hyrax																				1		1		1			1		1
37	Dendromus mesomelas	Climbing Mouse																				1		1		1			1		1
38	Dendromus sp	Climbing Mouse																				1		1		1			1		1
39	Deomys ferrugineus	Congo Forest Mouse																				1		1		1			1		1
40	Diceros bicornis	Black rhinoceros					1	1			1
41	Equus quagga	Zebra	Imparage	E			1	1			1
42	Felis aurata	Golden Cat	Injangwe	VU			1	1			1		1			1						1		1		1		1	1	1	1
43	Felis Serval	Serval	Imondo													1						1		1		1		1	1		1
44	Felis silvestris	Wild Cat	Inturo													1						1		1		1		1	1		1
45	Funisciurus carruthersi	Carruther's Mountain Tree Squirrel																				1		1		1			1		1
46	Funisciurus pyrropus	Cuvier's Fire-footed Squirrel																				1		1		1	1		1		1	1
47	Galago inustus	Eastern Needle-clawed Galago																				1		1		1			1		1
48	Genetta servalina	Servaline Genet	Urutoni													1						1		1		1		1	1		1
49	Genetta tigrina	Blotched Genet																				1		1		1			1		1
50	Giraffa camelopardalis	Giraffe	Munagajosi	CE			1	1			1
51	Gorilla beringei beringei	Mountain Gorilla	Ingagi	CE									1			1												1		1
52	Heliosciurus ruwenzorii	Montane Sun Squirrel																				1		1		1	1		1		1	1
53	Herpestes ichneumon	Ichneumon Mongoose	Umutereli			1										1						1		1		1		1	1		1
54	Herpestes sanguineus	Slender mongoose	Akayongwe													1						1		1		1		1	1		1
55	Herpestes urva	Crab-eating Mongoose																									1					1
56	Hippopotamus amphibius	Common hippopotamus or Hippo	Imvubu	E			1	1			1																		1
57	Hippotragus equinus	Roan antelope	Inkoronko	E			1	1			1
58	Hybomys univitatus	Hump-nosed mice																				1		1		1			1		1
59	Hybomys univittatus	Peter's Striped Mouse																				1		1		1			1		1
60	Hylochoerus meinertzhageni	Giant Forest Hog																				1		1		1			1		1
61	Hylomyscus denniae	Eastern African Montane Wood Mouse																				1		1		1			1		1
62	Hylomyscus stella	Stella Hylomyscus																				1		1		1			1		1
63	Hypsignathus monstrosus	Hammer-headed fruit bat																				1		1		1			1		1
64	Hystrix africae	Porcupine	Ikinyogote													1												1
65	Ichneumia albicauda	White-tailed Mongoose	Igiharangu													1												1
66	Kerivoula cuprosa	copper woolly bat																				1		1		1			1		1
67	Kobus ellipsiprymnus	Waterbuck	Indonyi	E			1	1			1
68	Lemniscomys striatus	Common Striped Grass Mouse																				1		1		1			1		1
69	Leptailurus serval	Serval	Imondo	VU			1	1			1		1			1						1		1		1		1	1	1	1
70	Lissonycteris angolensis	Angolan Fruit Bat																				1		1		1			1		1
71	Lophocebus albigena	Grey-cheeked Mangabey	Igishabaga	E																		1		1		1			1		1
72	Lophuromys flavopunctatus	Eastern Brush-furred Rat																				1		1		1			1		1
73	Lophuromys luteogaster	Brush-furred Rat																				1		1		1			1		1
74	Lophuromys rahmi	Brush-furred Rat		E																		1		1		1			1		1
75	Lophuromys woosnami	Woosnam's Brush-furred rat																				1		1		1			1		1
76	Loxodonta africana africana	African savannah elephant	Inzovu	CE			1	1			1
77	Loxodonta Africana cyclotis	African forest elephant	Inzovu	CE									1			1												1		1
78	Malacomys longipes	Long-footed Rat																				1		1		1			1		1
79	Manis tricuspis	African white-bellied pangolin																				1		1		1			1		1
80	Megaloglosus woermanni																					1		1		1			1		1
81	Miniopteris inflatus	Long fingered bats																				1		1		1			1		1
82	Mungos mungo	Banded Mongoose	Umuga													1												1
83	Mus bufo	Western Rift Pygmy Mouse																				1		1		1			1		1
84	Mus minutoides	Pygmy Mouse																				1		1		1			1		1
85	Mus triton	Grey-bellied Pygmy Mouse																				1		1		1			1		1
86	Nandinia binotata	African Palm Civet	Impimbi													1						1		1		1		1	1		1
87	Nycteris argae	Slit-faced bats																				1		1		1			1		1
88	Nycteris nana	Slit-faced bats																				1		1		1			1		1
89	Oenomys hypoxanthus	Rusty-nosed Rat																				1		1		1			1		1
90	Oreotragus oreotragus	Klipspringer	Igihindamabare	E			1	1			1
91	Oryctolagus cuniculus	Common Rabbit		E		1													1		1
92	Otomys denti	Montane Groove-toothed Rat																				1		1		1			1		1
93	Otomys tropicalis	Tropical Groove-toothed Rat																				1		1		1			1		1
94	Ourebia ourebi	Oribi					1	1			1
95	Pan troglodytes	Chimpanzee	Impundu	E																		1		1		1	1	1	1	1	1	1
96	Pan troglodytes schweinfurthii	eastern chimpanzees																									1	1		1		1
97	Panthera leo	Lion					1	1			1
98	Panthera pardus	Leopard	Ingwe	E	CITES		1	1	1		1					1						1		1		1		1	1		1
99	Papio anubis	Olive Baboon			CITES		1	1	1		1											1		1		1			1		1
100	Paracrocidura maxima	East African Montane Shrew																				1		1		1			1		1
101	Paraxerus alexandri	Alexander's squirrel																				1		1		1			1		1
102	Paraxerus boehmi	Boehm's squirrel																				1		1		1			1		1
103	Perodictus potto	Bosman's potto																				1		1		1			1		1
104	Phacochoerus africanus	Warthog	Isatura	E			1	1			1
105	Philantomba monticola	Blue Duiker							1
106	Pipistrellus africanus	Pipistrelles sp																				1		1		1			1		1
107	Pipistrellus capensis	Pipistrelles sp																				1		1		1			1		1
108	Pipistrellus eisentrauti	Pipistrelles sp																				1		1		1			1		1
109	Pipistrellus kuhlii	Pipistrelles sp																				1		1		1			1		1
110	Poecilogale albinuca	African Striped Weasel	Inkoryo													1												1
111	Potamochoerus larvatus larvatus	Bushpig	Ingurube	VU			1	1			1											1		1		1			1		1
112	Potamochoerus porcus	Red River Hog																											1
113	Praomys degraafi	Soft-furred rat																				1		1		1			1		1
114	Praomys jacksoni	Jackson's Soft-furred Rat																				1		1		1			1		1
115	Procavia johnstoni	Rock Hyrax	Impereryi													1												1
116	Profelis aurata	African Golden Cat																			1
117	Protoxerus stangeri	African Giant Squirrel																				1		1		1			1		1
118	Rattus rattus	Black Rat																				1		1		1			1		1
119	Redunca arundinum	Reedbuck	Isasu	CE			1	1			1
120	Rhinolophus hilli	Horsehoe bat		CE																		1		1		1			1		1
121	Rhinolophus maclaudi	Maclaud's Horseshoe Bat																				1		1		1			1		1
122	Rousettus aegyptiacus	Egyptian Fruit Bat	Agacurama	VU			1	1			1		1			1						1		1		1		1	1	1	1
123	Rousettus lanosus	Long-haired Rousette																				1		1		1			1		1
124	Ruwenzorisorex suncoides	Osgood's Montane Shrew		E																		1		1		1			1		1
125	Sciuridae	Squirrel											1			1											1	1		1		1
126	Scotoecus hirundo	dark-winged lesser house bat																				1		1		1			1		1
127	Scutisorex somereni	Hero Shrew																				1		1		1			1		1
128	Stenonycteris lanosus	Mountain Fruit Bat																				1		1		1			1		1
129	Sylvicapra grimmia	Common duikers	Isha	E			1	1			1		1			1												1		1
130	Sylvisorex granti	Least Long-tailed Forest Shrew																				1		1		1			1		1
131	Sylvisorex lunaris	Moon Forest Shrew		E																		1		1		1			1		1
132	Sylvisorex vulcanorum	Forest Shrew		E									1			1						1		1		1		1	1	1	1
133	Syncerus caffer caffer	African savannah buffalo	Imbogo	E			1	1			1
134	Syncerus caffer nanus	African forest buffalo	Imbogo	E									1			1												1		1
135	Tachyoryctes splendens	Orange-toothed Mole Rat																				1		1		1			1		1
136	Taurotragus oryx	Eland	Inimba	E			1	1			1
137	Thamnomys venustus	Kemp's Forest Rat		E																		1		1		1			1		1
138	Thryonomydae																										1					1
139	Thryonomys gregorianus	Marsh Cane Rat																				1		1		1			1		1
140	Thryonomys swinderianus	Ground hog																									1					1
141	Tragelaphus scriptus	Bushbuck	Impongo	E			1	1			1		1			1						1		1		1		1		1	1
142	Tragelaphus spekii	Sitatunga	Inzobe	E			1	1			1
TOTAL						3	32	32	8	1	32	0	13	0	0	25	0	0	1	0	5	99	1	99	0	100	13	29	99	16	99	13	0	0	0
CE				6
E				32
VU				5
CITES					5

## Sheet: Birds
				Status		Eastern Province							Northern Province					Southern Province								Western Province							City of Kigali
						Bugesera	Gatsibo	Kayonza	Kirehe	Ngoma	Nyagatare	Rwamagana	Burera	Gakenke	Gicumbi	Musanze	Rulindo	Gisagara	Huye	Kamonyi	Muhanga	Nyamagabe	Nyanza	Nyaruguru	Ruhango	Karongi	Ngororero	Nyabihu	Nyamasheke	Rubavu	Rusizi	Rutsiro	Kicukiro	Gasabo	Nyarugenge
	Scientific name	English name	Local name	IUCN	CITES	N: 391; CE: 11; E: 9, VU: 7, CITES: 2
1	Accipiter melanoleucus	Great Sparrowhawk																				1		1		1			1		1
2	Accipiter rufiventris	Rufous Sparrowhawk																				1		1		1			1		1
3	Accipiter tachiro	African Goshawk																				1		1		1			1		1
4	Acrocephalus baeticatus	African Reed Warbler																									1	1		1		1
5	Acrocephalus scirpaceus	Eurasian Reed Warbler							1
6	Actitis hypoleucos	Common Sandpiper																				1		1		1			1		1
7	Alcedo quadribrachys	Shining-blue Kingfisher																				1		1		1			1		1
8	Alethe poliophrys	Red-throated Alethe																				1		1		1			1		1
9	Amaurornis flavirostis						1	1	1		1
10	Amblyospiza albifrons						1	1	1		1
11	Anas sparsa	African Black Duck																				1		1		1			1		1
12	Anas undalata	Yellow-billed Duck											1									1		1		1			1		1
13	Anastomus lamelligerus	African open-billed Stork					1	1	1		1
14	Andropadus curvirostris	Cameroon Sombre Greenbul																				1		1		1			1		1
15	Andropadus gracilirostris	Slender-billed Greenbul																				1		1		1			1		1
16	Andropadus latirostris	Yellow-whiskered Greenbul																				1		1		1			1		1
17	Andropadus masukuensis	Shelley's Greenbul																				1		1		1			1		1
18	Andropadus tephrolaemus	Mountain Greenbul																				1		1		1			1		1
19	Anthreptes collaris	Collared Sunbird																				1		1		1			1		1
20	Anthreptes seimundi	Little Green Sunbird																				1		1		1			1		1
21	Anthus cinnmoneus	Grassland Pipit																				1		1		1			1		1
22	Anthus leucophrys						1	1	1		1
23	Anthus novaeseelandiae	Richard's Pipit																				1		1		1			1		1
24	Anthus trivialis	Tree Pipit																				1		1		1			1		1
25	Apalis argentea	Kungwe Apalis																				1		1		1			1		1
26	Apalis binotata	Masked Apalis																				1		1		1			1		1
27	Apalis cinerea	Grey Apalis																				1		1		1			1		1
28	Apalis jacksoni	Black-throated Apalis																				1		1		1			1		1
29	Apalis personata	Montane Masked Apalis																				1		1		1	1		1		1	1
30	Apalis porphyrolaema	Chestnut-throated Apalis																				1		1		1			1		1
31	Apalis pulchra	Black-collared Apalis																				1		1		1			1		1
32	Apalis rufogularis	Buff-throated Apalis																				1		1		1			1		1
33	Apalis ruwenzori	Collared Apalis																				1		1		1			1		1
34	Apaloderma narina	Narina's Trogon																				1		1		1			1		1
35	Apaloderma vittatum	Bar-tailed Trogon																				1		1		1			1		1
36	Aplopelia larvata	Lemon Dove																				1		1		1			1		1
37	Apus affinis	Little Swift																									1	1		1		1
38	Apus apus	Eurasian Swift																				1		1		1			1		1
39	Apus caffer	White-rumped Swift																				1		1		1			1		1
40	Aquila rapax	Tawny Eagle		VU																							1	1		1		1
41	Aquila wahlbergi	Wahlberg's Eagle														1						1		1		1			1		1
42	Ardea goliath	Goliath Heron																				1		1		1			1		1
43	Ardea melanocephala	Black-headed Heron											1									1		1		1			1		1
44	Ardea purpureus						1	1	1		1
45	Ardeola idae	Madagascar Pond Heron		E		1	1	1			1																			1		1	1	1	1
46	Ardeola ralloides	Squacco Heron																				1		1		1			1		1
47	Arizelocichla nigriceps kikuyuensis	Eastern Mountain-Greenbul																									1	1		1		1
48	Balaeniceps rex	Shoebill stalk	Munwarukweto	CE			1	1			1
49	Balearica regulorum	Grey Crowned Crane	Umusambi	CE	CITES		1	1	1		1		1									1		1		1	1	1	1	1	1	1
50	Bathmocercus rufus	Black-faced Rufous Warbler																				1		1		1			1		1
51	Batis diops	Rwenzori Batis																				1		1		1			1		1
52	Batis molitor	Chin-spot Batis																				1		1		1			1		1
53	Bostrychia hagedash	Hadada ibis					1	1	1		1											1		1		1			1		1
54	Bradypterus baboecala	Little Rush Warbler																				1		1		1			1		1
55	Bradypterus cinnamomeus	Cinnamon Bracken Warbler																				1		1		1			1		1
56	Bradypterus graueri	Grauer’s Swamp warbler	Incenceberi	E									1			1						1		1		1	1	1	1	1	1	1
57	Bradypterus lopezi	Evergreen Forest Warbler																				1		1		1			1		1
58	Bubo africanus	Spotted Eagle Owl																				1		1		1			1		1
59	Bubo lacteus	Verreaux's Eagle Owl																				1		1		1			1		1
60	Bubo poensis	Fraser's Eagle Owl																				1		1		1			1		1
61	Bubulcus ibis	Cattle Egret				1	1	1	1		1											1		1		1			1	1	1	1
62	Bucorvus leadbeateri	Southern Ground-hornbill	Ikigungumuka	CE			1	1			1
63	Buteo augur	Augur Buzzard																				1		1		1			1		1
64	Buteo buteo	Common Buzzard																				1		1		1			1		1
65	Buteo oreophilus	Mountain Buzzard																				1		1		1			1		1
66	Calamonastides gracilirostris	Papyrus Yellow Warbler		E		1	1	1			1		1																						1
67	Camaroptera brachyura	Grey-backed Camaroptera																				1		1		1			1		1
68	Camaroptera brachyura aschani	Green-backed Camaroptera																									1	1		1		1
69	Campephaga flava	Black Cuckoo Shrike																				1		1		1			1		1
70	Campethera nivosa	Buff-spotted Woodpecker																				1		1		1			1		1
71	Campethera tullbergi	Fine-banded Woodpecker																				1		1		1			1		1
72	Campethera tullbergi taeniolaema	Tullberg’s Woodpecker																									1	1		1		1
73	Caprimulgus fossii	Square-tailed Nightjar																				1		1		1			1		1
74	Caprimulgus pectoralis	Fiery-necked Nightjar																				1		1		1			1		1
75	Caprimulgus poliocephalus	Montane Nightjar																				1		1		1			1		1
76	Caprimulgus ruwenzorii	Ruwenzori Nightjar																				1		1		1			1		1
77	Centropus monachus	Blue-headed Coucal																				1		1		1			1		1
78	Ceratogymna subcylindricus	Black and White Casqued Hornbill																				1		1		1			1		1
79	Cercococcyx montanus	Barred Long-tailed Cuckoo																				1		1		1			1		1
80	Cercotrichas hartlaubi	Brown-backed Scrub Robin																				1		1		1			1		1
81	Ceryle rudis	Pied kingfisher				1																							1
82	Ceuthmochares aereus	Green Coucal				1																1		1		1			1		1
83	Chalcomitra senegalensis	Scarlet-chested Sunbird																				1		1		1			1		1
84	Chloropeta natalensis	Yellow Warbler																				1		1		1			1		1
85	Chloropeta similis	Mountain Yellow Warbler																				1		1		1			1		1
86	Chloropicus namaquus	Bearded Woodpecker																									1	1		1		1
87	Chrysococcyx cupreus	Emerald Cuckoo																				1		1		1			1		1
88	Chrysococcyx klaas	Klaas' Cuckoo																				1		1		1			1		1
89	Ciconia ciconia Ciconiidae	White Stork																				1		1		1			1		1
90	Cinnyricinclus sharpii	Sharpe's Starling																				1		1		1			1		1
91	Cinnyris bifasciatus	Purple-banded Sunbird																											1
92	Cinnyris regia	Regal Sunbird																				1		1		1	1		1		1	1
93	Cinnyris rockefelleri	Rockefeller's Sunbird																				1		1		1			1		1
94	Cinnyris stuhlmanni	Stuhlmann’s Sunbird																									1	1		1		1
95	Cinnyris venusta	Variable Sunbird																				1		1		1			1		1
96	Circus ranivorus												1
97	Cisticola ayresii	Wing-snapping Cisticola																				1		1		1			1		1
98	Cisticola brachyptera	Siffling Cisticola																				1		1		1			1		1
99	Cisticola chubbi	Chubb's Cisticola																				1		1		1			1		1
100	Cisticola juncidis												1
101	Cisticola sp.						1	1	1		1		1
102	Colius leucocephalus	White-headed mousebird																									1					1
103	Colius striatus	Speckled Mousebird					1	1	1		1											1		1		1			1		1
104	Columba arquatrix	African Olive Pigeon																				1		1		1			1		1
105	Columba unicincta	Afep Pigeon																				1		1		1			1		1
106	Coracias caudata						1	1	1		1
107	Coracias garrulus	Eurasian Roller																				1		1		1			1		1
108	Coracina caesia	Grey Cuckoo Shrike																				1		1		1			1		1
109	Corvus albicollis	White-necked Raven																				1		1		1			1		1
110	Corvus albus												1
111	Corythaeola cristata	Great Blue Turaco																				1		1		1	1	1	1	1	1	1
112	Corythaixoides personata						1	1	1		1
113	Cossypha archeri	Archer's Ground Robin																				1		1		1			1		1
114	Cossypha caffra	Cape Robin Chat				1																1		1		1			1		1
115	Cossypha natalensis	Red-capped Robin Chat																				1		1		1	1	1	1	1	1	1
116	Cossypha niveicapilla	Snowy-headed Robin Chat																				1		1		1			1		1
117	Cossyphicula roberti	White-bellied Robin Chat																				1		1		1			1		1
118	Coturnix adansonii	Blue Quail																				1		1		1			1		1
119	Coturnix coturnix	Common Quail																				1		1		1			1		1
120	Crithagra burtoni	Thick-billed Seedeater																									1	1		1		1
121	Crithagra frontalis	Western Citril																									1	1		1		1
122	Crithagra striolata	Streaky Seedeater																									1	1		1		1
123	Cryptospiza jacksoni	Dusky Crimson-wing																				1		1		1			1		1
124	Cryptospiza reichenovii	Red-faced Crimson-wing																				1		1		1			1		1
125	Cryptospiza salvadorii	Abyssinian Crimson-wing																				1		1		1			1		1
126	Cryptospiza shelleyi	Shelley's Crimson-wing		VU																		1		1		1			1		1
127	Cuculus canorus	Eurasian Cuckoo																				1		1		1			1		1
128	Cuculus clamosus	Black Cuckoo																				1		1		1			1		1
129	Cuculus solitarius	Red-chested Cuckoo								1												1		1		1	1	1	1	1	1	1
130	Cyanomitra alinae	Blue-headed Sunbird																									1	1		1		1
131	Cyanomitra cyanolaema	Blue-throated Brown Sunbird																				1		1		1			1		1
132	Cyanomitra olivacea	Olive Sunbird																				1		1		1			1		1
133	Cyanomitra verticalis	Green-headed Sunbird																									1	1		1		1
134	Delichon urbica	House Martin																				1		1		1			1		1
135	Dendropicos fuscescens	Cardinal Woodpecker																				1		1		1			1		1
136	Dendropicos griseocephalus	Olive Woodpecker																				1		1		1			1		1
137	Dicrurus adsimilis	Fork-tailed Drongo																				1		1		1			1		1
138	Dryoscopus angolensis	Pink-footed Puffback																				1		1		1			1		1
139	Dryoscopus gambensis	Northern Puffback																				1		1		1			1		1
140	Dryoscopus senegalensis	Red-eyed Puffback																				1		1		1			1		1
141	Dyaphorophyia concreta	Yellow-bellied Wattle-eye																				1		1		1			1		1
142	Elanus caeruleus	Black-shouldered Kite																				1		1		1			1		1
143	Elanus coeruleus												1
144	Elminia albicauda	White-tailed Blue Flycatcher																				1		1		1			1		1
145	Elminia albiventris	White-bellied Crested Flycatcher																				1		1		1			1		1
146	Elminia albonotatus	White-tailed Crested Flycatcher																				1		1		1			1		1
147	Emberiza flaviventris	Golden-breasted Bunting																				1		1		1			1		1
148	Emberiza tahapisi	Cinnamon-breasted Rock Bunting																				1		1		1			1		1
149	Eminia lepida	Grey-capped Warbler					1	1	1		1											1		1		1			1		1
150	Ephippiorhynchus seneg.						1	1	1		1
151	Estrilda astrild						1	1	1		1		1
152	Estrilda atricapilla	Black-headed Waxbill																				1		1		1			1		1
153	Estrilda kandti	Kandt’s Waxbill																									1	1		1		1
154	Estrilda melanotis	Yellow-bellied Waxbill																				1		1		1			1		1
155	Estrilda nonnula	Black-crowned Waxbill																				1		1		1			1		1
156	Estrilda paludicola	Fawn-breasted Waxbill					1	1	1		1		1									1		1		1			1		1
157	Estrilda rhodopyga	Crimson rumped waxbill																				1		1		1			1		1
158	Euplectes albonatatus						1	1	1		1
159	Euplectes axillaris						1	1	1		1		1
160	Euplectes capensis	Yellow Bishop											1									1		1		1			1		1
161	Euplectes hordeaceus	Black-winged Red Bishop																				1		1		1			1		1
162	Euplectes orix												1
163	Euschistospiza cinereovinacea	Dusky Twinspot																				1		1		1			1		1
164	Falco biarmicus	Lanner Falcon																				1		1		1			1		1
165	Falco concolor	Sooty falcon			CITES						1
166	Falco peregrinus	Peregrine Falcon																				1		1		1			1		1
167	Falco subbuteo	Eurasian Hobby																				1		1		1	1	1	1	1	1	1
168	Falco tinnunculus	Common Kestrel																				1		1		1			1		1
169	Francolinus afer	Red-necked Spurfowl Francolin	Inkware	VU		1	1	1	1	1	1		1			1							1												1
170	Francolinus levaillantii	Red-winged Francolin																				1		1		1			1		1
171	Francolinus nobilis	Handsome Francolin	Inkware	VU		1			1													1		1		1	1	1	1	1	1	1
172	Francolinus squamatus	Scaly Francolin																				1		1		1			1		1
173	Gallinago gallinago	Common Snipe																				1		1		1			1		1
174	Gallinago nigripennis												1
175	Geokichla piaggiae tanganjicae	Kivu Ground Thrush																									1					1
176	Glaucidium albertinum	Albertine Owlet																				1		1		1			1		1
177	Glaucidium capense	Barred Owlet																				1		1		1			1		1
178	Glaucidium tephronotum	Red-chested Owlet																				1		1		1			1		1
179	Graueria vittata	Grauer's Warbler																				1		1		1			1		1
180	Gymnobucco bonapartei	Grey-throated Barbet																				1		1		1			1		1
181	Halcyon leucocephala	Chestnut-bellied Kingfisher																				1		1		1			1		1
182	Halcyon malimbica	Blue-breasted kingfisher																				1		1		1			1		1
183	Halcyon senegalensis						1	1	1		1		1
184	Hedydipna collaris	Collared Sunbird																									1	1		1		1
185	Hemitesia neumanni	Short-tailed/Neumann's Warbler																				1		1		1			1		1
186	Hirundo abyssinica	Lesser Striped Swallow											1									1		1		1			1		1
187	Hirundo angolensis	Angola Swallow																				1		1		1			1		1
188	Hirundo daurica	Red-rumped Swallow																				1		1		1			1		1
189	Hirundo fuligula	African Rock Martin																				1		1		1			1		1
190	Hirundo rustica	Barn Swallow																				1		1		1	1	1	1	1	1	1
191	Hirundo senegalensis	Mosque Swallow																				1		1		1			1		1
192	Hyliota violacea	Violet-backed Hyliota																				1		1		1			1		1
193	Illadopsis pyrrhoptera	Mountain Illadopsis																				1		1		1			1		1
194	Indicator Conirostris	Thick-Billed Honeyguide																				1		1		1			1		1
195	Indicator exilis	Least Honeyguide																				1		1		1			1		1
196	Indicator indicator	Greater Honeyguide																				1		1		1			1		1
197	Indicator minor	Lesser Honeyguide																				1		1		1			1		1
198	Indicator pumilio	Dwarf Honeyguide																				1		1		1			1		1
199	Indicator variegatus	Scaly-throated Honeyguide																				1		1		1			1		1
200	Ispidina Picta	African Pygmy Kingfisher																				1		1		1			1		1
201	Jynx ruficollis	Red throated Wryneck																				1		1		1			1		1
202	Kakamega poliothorax	Grey-chested Illadopsis																				1		1		1			1		1
203	Kupeornis rufocinctus	Red-collared Mountain Babbler		VU																		1		1		1			1		1
204	Lagonostica rhodopareia	Jameson's firefinch							1
205	Lagonosticta rubricata	African Firefinch																				1		1		1			1		1
206	Lagonosticta senegala						1	1	1		1
207	Lamprotornis caudatus						1	1	1		1
208	Lamprotornis chalybaeus						1	1	1		1
209	Lamprotornis purpuropterus	Rüppell's starling				1
210	Laniarius erythrogaster						1	1	1		1
211	Laniarius holomelas	Albertine Boubou																									1	1		1		1
212	Laniarius luehderi	Luhder's Bush Shrike																				1		1		1			1		1
213	Laniarius major	Tropical Boubou																									1	1		1		1
214	Laniarius mufumbiri	Papyrus gonolek		E		1	1	1	1	1	1
215	Laniarius poensis	Montane Sooty Boubou																				1		1		1			1		1
216	Laniarius willardi	Willard’s Sooty Boubou																									1	1		1		1
217	Lanius collaris	Common Fiscal																				1		1		1			1		1
218	Lanius collurio	Red-backed Shrike								1												1		1		1			1		1
219	Lanius humeralis	Northern Fiscal																									1	1		1		1
220	Lanius mackinnoni	Mackinnon's Shrike																				1		1		1			1		1
221	Lanius minor	Lesser grey shrike								1
222	Leptoptilos crumeniferus	Marabou stork									1
223	Limnocorax flavirostra	Black Crake																				1		1		1			1		1
224	Linurgus olivaceus	Oriole Finch																				1		1		1			1		1
225	Lonchura bicolor	Black and White Mannikin																				1		1		1			1		1
226	Lonchura cucullata	Bronze Mannikin																				1		1		1			1		1
227	Lophaetus occipitalis	Long-crested Eagle											1									1		1		1			1		1
228	Lybius rubrifacies	Red-faced barbet		E			1	1			1
229	Macheiramphus alcinus	Bat Hawk																				1		1		1			1		1
230	Macrodipteryx vexillarius	Pennant-winged Nightjar																				1		1		1			1		1
231	Macronyx croceus	Yellow throated long claw																				1		1		1	1		1		1	1
232	Malaconotus dohertyi	Doherty's Bush Shrike																				1		1		1			1		1
233	Malaconotus lagdeni	Lagden's Bush Shrike																				1		1		1			1		1
234	Malaconotus multicolor	Many-coloured Bush Shrike																				1		1		1			1		1
235	Malaconotus nigrifrons	Black-fronted Bush-Shrike																				1		1		1			1		1
236	Melaenornis ardesiacus	Yellow-eyed Black Flycatcher																				1		1		1			1		1
237	Melaenornis chocolatinus	Slaty flycatcher																				1		1		1			1		1
238	Melaenornis fischeri	White-eyed Slaty Flycatcher																				1		1		1			1		1
239	Merops apiaster	Eurasian Bee-eater								1												1		1		1	1	1	1	1	1	1
240	Merops oreobates	Cinnamon-chested Bee-eater																				1		1		1			1		1
241	Merops pusillus						1	1	1		1
242	Merops superciliosus	Madagascar Bee-eater																				1		1		1			1		1
243	Mesopicos elliotii	Elliot's Woodpecker																				1		1		1			1		1
244	Microparra capensis	Lesser Jacana		CE		1							1
245	Milvus migrans	Black Kite					1	1	1		1		1									1		1		1			1	1	1	1
246	Monticola angolensis	Miombo Rock Thrush																				1		1		1			1		1
247	Motacilla capensis	Cape Wagtail											1									1		1		1			1		1
248	Motacilla cinerea	Grey Wagtail																				1		1		1			1		1
249	Motacilla clara	Mountain Wagtail																				1		1		1			1		1
250	Motacilla flava	Yellow Wagtail																				1		1		1			1		1
251	Muscicapa adusta	Dusky Flycatcher																				1		1		1			1		1
252	Muscicapa aquatica						1	1	1		1
253	Muscicapa caerulescens	Ashy Flycatcher																				1		1		1			1		1
254	Muscicapa cassini	Cassin's Grey Flycatcher																				1		1		1			1		1
255	Muscicapa lendu	Chapin's Flycatcher																				1		1		1			1		1
256	Muscicapa striata	Spotted Flycatcher																				1		1		1			1		1
257	Musophaga rossae	Ross's Turaco																				1		1		1	1	1	1	1	1	1
258	Myioparus plumbeus	Lead-coloured Flycatcher																				1		1		1			1		1
259	Myrmecocichla arnoti	White headed black chat																				1		1		1			1		1
260	Necrosyrtes monachus	Hooded vulture	Inkongoro	E																						1
261	Nectarinia afra	Greater Double-collared sunbird																				1		1		1			1		1
262	Nectarinia alinae	Blue-headed Sunbird																				1		1		1			1		1
263	Nectarinia chloropygia						1	1	1		1
264	Nectarinia erythrocerca						1	1	1		1
265	Nectarinia famosa	Malachite Sunbird											1									1		1		1			1		1
266	Nectarinia kilimensis	Bronze Sunbird																				1		1		1			1		1
267	Nectarinia preussi	Northern Double-collared Sunbird																				1		1		1			1		1
268	Nectarinia purpureiventris	Purple-breasted Sunbird																				1		1		1			1		1
269	Neocossyphus poensis	White-tailed Ant Thrush																				1		1		1			1		1
270	Neotis denhami	Denham's Bustard		E			1	1			1
271	Netta erythrophthalma	Southern Pochard		CE		1	1	1	1		1
272	Nettapus auritus	The African pygmy goose																											1
273	Nigrita canicapilla	Grey-headed Negrofinch																				1		1		1			1		1
274	Nigrita fusconota	White-breasted Negrofinch																				1		1		1			1		1
275	Numida meleagris	Helmeted Guineafowl	Inkanga	VU		1	1	1	1		1
276	Nycticorax nyticorax	Black-crowned Night-Heron																				1		1		1			1		1
277	Onychognathus tenuirostris	Slender-billed Chestnut-winged Starling																				1		1		1			1		1
278	Onychognathus walleri	Waller's Chestnut-winged Starling																				1		1		1			1		1
279	Oriolus auratus	African Golden Oriole																				1		1		1			1		1
280	Oriolus percivali	Montane Oriole																				1		1		1			1		1
281	Oxylophus levaillantii	Levaillant's Cuckoo																				1		1		1			1		1
282	Parus fasciiventer	Stripe-breasted Tit																				1		1		1	1		1		1	1
283	Parus funereus	Dusky Tit																				1		1		1			1		1
284	Passer griseus						1	1	1		1
285	Pernis apivorus	Honey Buzzard																				1		1		1			1		1
286	Phalacrocorax africanus	Long-tailed Cormorant																				1		1		1			1		1
287	Phalacrocorax carbo	Great cormorant																											1
288	Phoeniculus bollei	White-headed Wood Hoopoe																				1		1		1			1		1
289	Phoeniculus castaneiceps	Forest Wood Hoopoe																				1		1		1			1		1
290	Phoeniculus purpureus	Green Wood Hoopoe																				1		1		1			1		1
291	Phyllastrephus fischeri	Fisher's Greenbul																				1		1		1			1		1
292	Phyllastrephus flavostriatus	Yellow-streaked Greenbul																				1		1		1			1		1
293	Phyllastrephus placidus	Placid Geenbul																				1		1		1			1		1
294	Phylloscopus laetus	Red-faced Woodland Warbler																				1		1		1			1		1
295	Phylloscopus trochilus	Willow Warbler																				1		1		1			1		1
296	Phylloscopus umbrovirens	Brown Woodland Warbler																				1		1		1			1		1
297	Pitta angolensis	African Pitta		VU												1
298	Platysteira cyanea	brown-throated/CommonWattle-eye																				1		1		1			1		1
299	Platysteira peltata	Black-throated Wattle-eye																				1		1		1			1		1
300	Ploceus alienus	Strange Weaver																				1		1		1			1		1
301	Ploceus baglafecht	Stuhlmann's/Baglafecht Weaver					1	1	1		1		1									1		1		1			1		1
302	Ploceus bicolor	Dark-backed Weaver																				1		1		1			1		1
303	Ploceus capitalis						1	1	1		1
304	Ploceus cucullatus	Black-headed/Village Weaver					1	1	1		1											1		1		1			1		1
305	Ploceus insignis	Brown-capped Weaver																				1		1		1			1		1
306	Ploceus melanogaster	Black-billed Weaver																				1		1		1			1		1
307	Ploceus ocularis						1	1	1		1
308	Ploceus xanthops	Holub’s Golden Weaver											1
309	Poeoptera stuhlmanni	Stuhlmann's Starling																				1		1		1			1		1
310	Pogoniulus bilineatus	Yellow-rumped Tinkerbird					1	1	1		1											1		1		1			1		1
311	Pogoniulus coryphaeus	Western Green Tinkerbird																				1		1		1			1		1
312	Pogonocichla stellata	White-starred Forest Robin																				1		1		1			1		1
313	Poicephalus robustus	Brown-necked Parrot																				1		1		1			1		1
314	Polemaetus bellicosus	Martial Eagle		CE																		1		1		1	1	1	1	1	1	1
315	Polyboroides typus	African Harrier Hawk																				1		1		1			1		1
316	Prinia bairdii	Banded Prinia																				1		1		1			1		1
317	Prinia leucopogon	White-chinned Prinia																				1		1		1			1		1
318	Prinia subflava	Tawny-flanked Prinia																				1		1		1			1		1
319	Prodotiscus zambesiae	Green-backed Honeyguide																				1		1		1			1		1
320	Psalidoprocne albiceps	White-headed Rough-wing																				1		1		1			1		1
321	Psalidoprocne pristoptera	Black Rough-wing																				1		1		1			1		1
322	Pseudoalcippe abyssinica	African Hill Babbler																				1		1		1			1		1
323	Psittacus erithacus	Grey Parrot	Kasuku	CE																		1		1		1			1		1
324	Pteronetta hartlaubii	Hartlaub's Duck																				1		1		1			1		1
325	Pycnonotus barbatus	Common/Yellow-vented Bulbul				1	1	1	1		1		1									1		1		1			1		1
326	Pycnonotus barbatus tricolor	Common Bulbul (Dark-capped)																									1	1		1		1
327	Quelia quelia						1	1	1		1
328	Rallus caerulescens	African Water Rail																				1		1		1			1		1
329	Riparia paludicola	African Sand Martin																				1		1		1			1		1
330	Riparia riparia	European Sand Martin																				1		1		1			1		1
331	Ruwenzornis johnstoni	Rwenzori Turaco																				1		1		1			1		1
332	Sarothrura elegans	Buff-spotted Flufftail																				1		1		1			1		1
333	Sarothrura pulchra	White-spotted Flufftail																				1		1		1			1		1
334	Sarothrura rufa	Red-chested Flufftail																				1		1		1			1		1
335	Saxicola rubetra	Whinchat																				1		1		1			1		1
336	Saxicola torquatus	Stonechat											1									1		1		1			1		1
337	Schoutedenapus myoptilus	Scarce Swift																				1		1		1			1		1
338	Scleroptil levaillantii	Redwing Francolin		E			1	1			1
339	Scopus umbretta	Hamerkop																				1		1		1	1		1		1
340	Serinus burtoni	Thick-billed Seed-eater																				1		1		1			1		1
341	Serinus canicollis	Yellow-crowned Canary																				1		1		1			1		1
342	Serinus citrinelloides	African Citril											1									1		1		1			1		1
343	Serinus koliensis	Papyrus Canary		E		1	1	1			1																								1
344	Serinus mozambicus						1	1	1		1
345	Serinus striolatus	Streaky Seed-eater											1									1		1		1			1		1
346	Serinus sulphuratus												1
347	Sheppardia aequatorialis	Equatorial Akalat																				1		1		1			1		1
348	Smithornis capensis	African Broadbill																				1		1		1			1		1
349	Spermophaga ruficapilla	Red-headed Bluebill																				1		1		1			1		1
350	Spizaetus africanus	Cassin's Hawk Eagle																				1		1		1			1		1
351	Stephanoaetus coronatus	Crowned Eagle																				1		1		1			1		1
352	Stiphrornis erythrothorax	Forest Robin																				1		1		1			1		1
353	Streptopelia capicola						1	1	1		1
354	Streptopelia lugens	Dusky Turtle Dove																				1		1		1			1		1
355	Streptopelia semitorquata	Red-eyed Dove					1	1	1		1		1									1		1		1			1		1
356	Streptopelia senegalensis	Laughing dove				1	1	1	1		1
357	Strix woodfordii	African Wood Owl																				1		1		1			1		1
358	Sylvia atricapilla	Blackcap																				1		1		1			1		1
359	Sylvia atriceps	Rwenzori Hill Babbler																									1	1		1		1
360	Sylvia borin	Garden Warbler																				1		1		1			1		1
361	Sylvietta leucophrys	White-browed Crombec																				1		1		1			1		1
362	Tauraco johnstoni	Rwenzori turaco																									1					1
363	Tauraco schuetti	Black-billed Turaco																				1		1		1	1	1	1	1	1	1
364	Tchagra australis	Brown-headed Tchagra																				1		1		1			1		1
365	Telophorus dohertyi	Doherty’s Bushshrike																									1	1		1		1
366	Telophorus multicolor	Many-colored Bushshrike																									1	1		1		1
367	Terathopius ecaudatus	Bateleur		CE																		1		1		1			1		1
368	Terpsiphone viridis	Paradise Flycatcher																				1		1		1			1		1
369	Thalassornis leuconotus	White-backed Duck		CE		1
370	Threskiornis aethiopicus	Sacred ibis											1									1		1		1			1		1
371	Tockus alboterminatus	Crowned Hornbill																				1		1		1			1		1
372	Torgos tracheliotus	Lappet-faced Vulture	Inkongoro	CE			1	1			1		1			1						1		1		1		1	1	1	1
373	Trachylaemus purpuratus	Yellow-billed Barbet																				1		1		1			1		1
374	Treron australis	Green Pigeon																				1		1		1			1		1
375	Trigonoceps occipitalis	White-headed Vulture		CE																		1		1		1			1		1
376	Tringa glareola	Wood Sandpiper																				1		1		1			1		1
377	Tringa ochropus	Green Sandpiper																				1		1		1			1		1
378	Trochocercus cyanomelas	Blue-mantled crested/Crested Flycatcher																				1		1		1			1		1
379	Turdoides sharpei						1	1	1		1
380	Turdus olivaceus	Olive thrush																				1		1		1			1		1
381	Turtur afer	Blue-spotted Wood Dove					1	1	1		1											1		1		1			1		1
382	Turtur tympanistria	Tambourine Dove																				1		1		1			1		1
383	Tyto capensis	Cape Grass Owl																				1		1		1			1		1
384	Upupa africana	African Hoopoe																				1		1		1			1		1
385	Upupa epops	Eurasian Hoopoe																				1		1		1			1		1
386	Uraeginthus bengalus	Red-cheeked Cordon-bleu					1	1	1		1											1		1		1			1		1
387	Urucolius macrourus						1	1	1		1
388	Vanellus senegallus						1	1	1		1
389	Vidua macroura	Pin-tailed Whydah					1	1	1		1											1		1		1			1		1
390	Zoothera tanganjicae	Kivu Ground Thrush																				1		1		1	1		1		1	1
391	Zosterops senegalensis	Yellow White-eye																				1		1		1			1		1
TOTAL						17	59	59	53	6	61	0	34	0	0	5	0	0	0	0	0	300	1	300	0	301	44	36	304	39	300	46	1	1	4
CE				11
E				9
VU				7
CITES					2

## Sheet: Fish
				Status		Eastern Province							Northern Province					Southern Province								Western Province							City of Kigali
						Bugesera	Gatsibo	Kayonza	Kirehe	Ngoma	Nyagatare	Rwamagana	Burera	Gakenke	Gicumbi	Musanze	Rulindo	Gisagara	Huye	Kamonyi	Muhanga	Nyamagabe	Nyanza	Nyaruguru	Ruhango	Karongi	Ngororero	Nyabihu	Nyamasheke	Rubavu	Rusizi	Rutsiro	Kicukiro	Gasabo	Nyarugenge
	Scientific name	English name	Local name	IUCN	CITES	N: 16; CE: 2; E: 0, VU: 0, CITES: 0, CITES: 0
1	Astatoreochromis alluaudi	Alluaud's haplo				1			1	1
2	Atilax paludinosus	Marsh Mongoose	Inzibyi																							1			1	1	1	1
3	Barbus acuticeps					1			1	1
4	Barbus kerstenii	Redspot barb		CE		1			1	1
5	Clarias gariepinus	African sharptooth catfish				1			1	1
6	Clarias liocephalus	Smoothhead catfish				1			1	1
7	Cyprinus carpio	Common carp				1			1	1
8	Haplochomis burtoni					1			1	1
9	Haplochromis Sp					1			1	1
10	Mastacembelus frenatus	Longtail spiny eel				1			1	1
11	Oreochromis leucosticus	Blue-spotted tilapia				1			1	1
12	Oreochromis macrochir	Greenhead tilapia		CE		1			1	1
13	Oreochromis niloticus	Nile tilapia				1			1	1
14	Protopterus aethiopicus	Marbled lungfish				1			1	1
15	Synodontis ruandae					1			1	1
16	Tilapia rendalli	Redbreast tilapia				1			1	1
TOTAL						15	0	0	15	15	0	0	0	0	0	0	0	0	0	0	0	0	0	0	0	1	0	0	1	1	1	1	0	0	0
CE				2
E				0
VU				0
CITES					0

## Sheet: Reptiles
				Status		Eastern Province							Northern Province					Southern Province								Western Province							City of Kigali
						Bugesera	Gatsibo	Kayonza	Kirehe	Ngoma	Nyagatare	Rwamagana	Burera	Gakenke	Gicumbi	Musanze	Rulindo	Gisagara	Huye	Kamonyi	Muhanga	Nyamagabe	Nyanza	Nyaruguru	Ruhango	Karongi	Ngororero	Nyabihu	Nyamasheke	Rubavu	Rusizi	Rutsiro	Kicukiro	Gasabo	Nyarugenge
	Scientific name	English name	Local name	IUCN	CITES	N: 32; CE: 0; E: 1, VU: 0, CITES: 1
1	Adolfus vauereselli												1			1						1				1		1	1
2	Atheris nitschei																					1				1			1
3	Bitis arietans	Puff adder				1	1	1	1	1	1	1									1
4	Bitis nasicornis																									1			1	1	1	1
5	Chamaeleo anchietae						1	1	1		1
6	Crocodylus niloticus						1	1	1		1
7	Dasypeltis scabra						1	1	1		1
8	Dendroaspis jamesoni kimosae	Jameson's (Green) mamba							1													1				1			1
9	Grayia thollonii						1	1	1		1
10	Kinixys spekii						1	1	1		1
11	Kinyongia adolfifriderici																					1				1			1
12	Lycophidion ornatum																					1				1			1
13	Naja melanoleuca	Forest cobra				1	1	1	1	1	1	1														1			1	1	1	1
14	Naja nigricollis	Black-necked spitting cobra				1	1	1	1	1	1	1
15	Natriciteres olivacea												1									1				1			1
16	Opheodrys vernalis	Smooth green snake				1
17	Pelusios subniger					1	1	1	1	1	1	1
18	Philothamnus heterolepidotus					1				1		1	1
19	Philothamnus ruandae																					1				1			1
20	Psammophis mossambicus						1	1	1		1
21	Python sebae	African rock python	Uruziramire	E	CITES	1	1	1	1	1	1					1
22	Rhamnophis aethiopissa																					1				1			1
23	Rhampholeon boulengeri												1			1						1		1		1		1	1	1	1	1
24	Thelotornis capensis	Twig snakes							1		1										1
25	Thrasops jacksoni																					1				1			1
26	Trachylepis striata	African striped skink									1
27	Trachylepis varia	Savanna variable skink									1
28	Trioceros ellioti					1	1	1	1	1	1	1
29	Trioceros johnstoni																					1				1			1
30	Typhlops angolensis																					1				1			1
31	Varanus niloticus	Nile monitor					1	1	1	1	1																				1
32	Vipera aspic					1
TOTAL						9	13	13	15	8	16	6	4	0	0	3	0	0	0	0	2	12	0	1	0	14	0	2	14	3	4	3	0	0	0
CE				0
E				1
VU				0
CITES					1

## Sheet: Amphibians
				Status		Eastern Province							Northern Province					Southern Province								Western Province							City of Kigali
						Bugesera	Gatsibo	Kayonza	Kirehe	Ngoma	Nyagatare	Rwamagana	Burera	Gakenke	Gicumbi	Musanze	Rulindo	Gisagara	Huye	Kamonyi	Muhanga	Nyamagabe	Nyanza	Nyaruguru	Ruhango	Karongi	Ngororero	Nyabihu	Nyamasheke	Rubavu	Rusizi	Rutsiro	Kicukiro	Gasabo	Nyarugenge
	Scientific name	English name	Local name	IUCN	CITES	N: 35; CE: 2; E: 1, VU: 3, CITES: 0
1	Afrixalus orophilus			VU																		1				1			1
2	Afrixalus quadrivittatus					1	1	1	1	1	1	1
3	Afrixalus sp.																					1				1			1
4	Amietia angolensis					1	1	1	1	1	1	1	1
5	Amietia sp.																					1				1			1
6	Amietophrynus kisoloensis												1									1				1			1
7	Amietophrynus regularis					1	1	1		1	1	1
8	Amietophrynus regularis					1			1	1		1
9	Hylarana albolabris					1	1	1	1	1	1		1
10	Hylarana galamensis						1	1	1		1
11	Hyperolius acuticeps					1	1	1	1	1	1	1
12	Hyperolius castaneus	Brown reed frog		CE									1			1						1		1		1		1	1	1	1
13	Hyperolius discodactylus			VU																		1				1			1
14	Hyperolius kivuensis					1	1	1	1	1	1	1	1
15	Hyperolius lateralis					1				1		1
16	Hyperolius sp.																					1				1			1
17	Hyperolius viridiflavus					1	1	1	1	1	1	1	1
18	Kassina senegalensis					1	1	1	1	1	1	1
19	Leptopelis bocagii						1	1	1		1		1									1				1			1
20	Leptopelis karissimbensis	Karisimbi tree frog		CE									1			1						1		1		1		1	1	1	1
21	Phlyctimantis verrucosus					1	1	1		1	1	1
22	Phrynobatrachus kakamikro					1	1	1	1	1	1	1
23	Phrynobatrachus natalensis					1	1	1	1	1	1	1
24	Phrynobatrachus sp. 1												1
25	Phrynobatrachus sp. 2						1	1	1		1
26	Phrynobatrachus sp. 3																					1				1			1
27	Phrynobatrachus stewartae	Stewart's puddle frog or Stewart's river frog				1	1	1	1	1	1		1
28	Phrynobatrachus versicolor			VU									1									1				1			1
29	Phrynomantis bifasciatus	Banded rubber frog				1	1	1	1	1	1		1
30	Ptychadena anchietae					1				1		1
31	Ptychadena mascareniensis					1	1	1	1	1	1	1	1
32	Ptychadena porosissima					1	1	1	1	1	1	1
33	Ptychadena sp.						1	1	1		1
34	Xenopus victorianus					1	1	1	1	1	1	1
35	Xenopus wittei	De Witte's clawed frog		E									1			1						1		1		1		1	1	1	1
TOTAL						19	20	20	19	19	20	16	14	0	0	3	0	0	0	0	0	12	0	3	0	12	0	3	12	3	3	0	0	0	0
CE				2
E				1
VU				3
CITES					0

## Sheet: Plants
				Status		Eastern Province							Northern Province					Southern Province								Western Province							City of Kigali
						Bugesera	Gatsibo	Kayonza	Kirehe	Ngoma	Nyagatare	Rwamagana	Burera	Gakenke	Gicumbi	Musanze	Rulindo	Gisagara	Huye	Kamonyi	Muhanga	Nyamagabe	Nyanza	Nyaruguru	Ruhango	Karongi	Ngororero	Nyabihu	Nyamasheke	Rubavu	Rusizi	Rutsiro	Kicukiro	Gasabo	Nyarugenge
	Scientific name	English name	Local name	IUCN	CITES	N: 221; CE: 7; E: 25, VU: 6, CITES: 2
1	Acacia brevispica		Umugeyo						1
2	Acacia combretum								1
3	Acacia gerrardii		Umugunga				1	1			1										1
4	Acacia hockii		Umugenge			1
5	Acacia kirkii	Kirk's acacia	Umunyinya, Umunyaryera	E							1
6	Acacia polyacantha		Umugunga						1	1													1
7	Acacia senegalensis		Umukonji						1
8	Acacia sieberiana		Umunyinya						1
9	Acanthus pubescens		Igitovu								1																1		1
10	Acokanthera schimperi		Umusagwe			1
11	Aerangis kotschyana				CITES																										1
12	Aerangis ugandensis									1
13	Aeschynomene elaphoxylon						1	1			1
14	Aframomum wuerthii			VU																		1		1		1			1		1
15	Afrocanthium lactescens	Afrocanthium	Umukondokondo	E		1
16	Agave sisalana		Umugwegwe																		1
17	Albizia amara	Bitter albizia	Umunaniranzovu	E			1	1			1
18	Albizia gummifera		Umusebeya						1												1					1	1				1
19	Albizia petersiana		Umumeya						1
20	Allophylus africanus		Umunywamazi, Umutete						1
21	Alnus glutinosa		Arunusi																		1						1
22	Annona senegalensis		Ikiryohera						1
23	Anthocleista grandiflora		Umuhanurantare						1
24	Anthocleista schweinfurthii																												1		1
25	Arsaena mildbraana												1			1												1		1
26	Asparagus africanus		Umushayishayi						1
28	Bersama abyssinica	Winged bersama	Umuturamugina, Umukaka	E									1			1						1		1		1	1	1	1	1	1	1
29	Blighia unijugata	Triangle tops	Umuturamugina	CE					1																				1
30	Boscia angustifolia var.corymbosa		Umuzizi			1
31	Bradypterus graueri												1			1												1		1
32	Bridelia brideliifolia		Umugimbu																										1
33	Bridellia micrantha		Umugimbu						1																						1
34	Bulbophyllum								1
35	Caesalpinia decapetala		Umufatangwe																										1
36	Calanthe sylvatica												1			1												1		1
37	Capparis tomentosa		Umukorokombe			1
38	Carapa grandiflora																										1	1		1		1
39	Carissa edulis		Umunyonza																1				1
40	Casearia runsorica		Imbayu, Umuhanda, Umuhandagore, Umunyereza	E																		1		1		1	1	1	1	1	1	1
41	Cercopithecus l’hoesti																														1
42	Chamaeangis sarcophylla												1			1												1		1
43	Chassalia subochreata		Ikibonobono, Umusabanyama, Umumenamabuye	E																	1						1	1		1		1
44	Chrysophyllum gorungosanum		Umutoyi																		1						1	1		1		1
45	Clausena anisata		Umuno						1
46	Clerodendrum rotundifolium		Ikiziranyenzi																								1
47	Clutia abyssinica		Umutarishonga																		1						1	1		1		1
48	Combretum collinum		Umurama				1	1	1		1
49	Combretum molle		Umukoyoyo			1																	1
50	Commiphora africana	African myrrh, Poison-grub commiphora	Umudahwera	E		1	1	1			1												1
51	Cordia africana		Umuvugangoma						1
52	Crossopteryx febrifuga								1
53	Cucumeria sp.												1			1												1		1
54	Cyathea manniana																										1	1		1		1
55	Cyperus latifolius												1
56	Cyperus papyrus		Urukangaga			1	1	1	1	1	1																		1
57	Cyperus sp.					1
58	Cyrtorchis arcuata								1				1			1												1		1
59	Dalbegia lactea		Umuhashya																		1
60	Dichaetanthera corymbosa		Umuhube																												1
61	Dichrostachys cinerea		Umuyebe			1
62	Disa stairssii												1			1												1		1
63	Dodonea viscosa		Umusasa, Umunyuragisaka																								1
64	Dombeya torrida	Forest dombeya	Umukore	E																	1						1	1		1		1
65	Dosternia nyungwensis			VU																		1		1		1			1		1
66	Dovyalis macrocalyx		Umusongati						1		1
67	Dracaena afromontana		Umuhati						1												1						1					1
68	Dracaena steudneri		Igihondohondo													1
69	Eichhornia crassipes					1			1	1
70	Elatostema monticola															1												1
71	Entada abyssinica		Umusange																												1
72	Entandrophragma excelsum	African mahogany	Umuyove	E																							1	1		1		1
73	Eragrostis racemosa																										1
74	Erica johnstonii			E																		1		1		1			1		1
75	Erythrina abyssinica		Umuko						1
76	Euclea racemosa																						1
77	Euclea schimper		Umushikiri			1
78	Eulophia guinensis								1
79	Euphorbia candelabrum		Umuduha						1
80	Euphorbia tirucalli																												1
81	Ficus acuta															1													1
82	Ficus asperifolia								1
83	Ficus cyathistipula																												1
84	Ficus oreodryanum																				1
85	Ficus sycomorus		Umukuyu, Umuvumu																												1
86	Ficus thonningii		Umuvumura, Umuvumu						1																				1
87	Ficus vallis-choudae		Umudobori, Umurehe						1																						1
88	Flacourtia indica		Urutaka			1
89	Galiniera saxifraga		Ikiryoheramuhogo, Umujaga																													1
90	Gardenia ternifolia		Umutarama			1
91	Genera Albizzia						1	1			1
92	Grewia bicolor					1			1
93	Grewia forbesii																												1
94	Grewia similis		Umukomagore			1
95	Grewia trichocarpa		Umukoma						1
96	Habenaria praestans												1			1												1		1
97	Hagenia abyssinica		Umugeti																								1	1		1		1
98	Hagenia/Hypericum												1			1												1		1
99	Hallea rubrostipulata								1
100	Hallea rubrostipulosa																									1
101	Haplocoelum foliorosum		Umujwiri			1
102	Harungana madagascariensis		Umushayishayi																										1
103	Harungana Montana		Umushayishayi	E																		1		1		1			1		1
104	Hymenocardia acida		Umusagamba						1
105	Hyparrhenia filipendula					1			1
106	Hyparrhenia lecomtei								1
107	Impatiens burtonii var.burtonii		Indondori													1												1
108	Impatiens mildbraedii																										1	1		1		1
109	Ixora burundiensis		Ikinesha, umuhotora	E																		1		1		1			1		1
110	Juncus sp		Ubusuna																		1
111	Kigelia africana	Sausage tree	Ikivungavungo	E		1	1	1			1
112	Lagenaria abyssinica		Umutanga						1
113	Lannea fulva		Umusinzigwa			1
114	Lannea…Parinari curatelifolia																						1
115	Lantana camara					1			1
116	Leucas deflexa															1												1
117	Lindackeria kiwuensis		Umunyagasozi, Bwizabwishyamba, Umwicarampundu, Ikinesha, Umubugidigwa, Umunyarubabi, Umuronzi	E																		1		1		1			1		1
118	Lobelia mildbraedii			CE									1			1						1		1		1		1	1	1	1
119	Lobelia petiolata			VU																		1		1		1			1		1
121	Macaranga kilimandscharica		Umusekera																								1				1	1
122	Macaranga neomildbraediana		Umurara																		1
123	Maesa lanceolata		Umuhanga																		1					1	1	1		1	1	1
124	Markhamia lutea		Umusave						1
125	Markhamia obstusifolia		Umukundambazo			1
126	Maytenus acuminata		Inembwe																								1					1
127	Maytenus senegalensis		Umweza			1
129	Microcoelia globulosa		Ingurukiza			1
130	Microglossa pyrifolia		Umunyuragisaka																										1
131	Mimulopsis excellens		Igihwapfu, Impwapfu	E																		1		1		1			1		1
132	Mimulopsis violacea		Umunayu																		1
133	Miscanthus violaceus			E									1
134	Mitragyna rubrostipulata		Umuzibaziba						1
135	Myrianthus holstii	Giant yellow mulberry	Umwufe	VU																	1					1	1
136	Myrica kandtiana																										1
137	Neoboutonia macrocalyx		Umwanya																							1	1					1
138	Neorautanenia mitis		Igitembatembe						1
139	Newtonia buchananii	Newtonia	Umukereko	E																											1
140	Nymphaea thermarum	Lily plant	Imposha	CE																											1
141	Ocotea usambarensis	Camphor	Umutake, Umuganzo	E																		1		1		1			1		1
142	Octomeron montanum																										1	1		1		1
143	Olea europea var. africana		Umunzenze			1
144	Olinia rochitiana		Umusasa																								1					1
145	Opuntia ficus-indica					1
146	Osyris lanceolata	African sandalwood	Umusheshe	CE		1																	1
147	Oxyanthus troupinii		Umutovu, Umugendajoro, Umuyebe, Ingongo	VU																		1		1		1			1		1
148	Ozoroa insignis		Umukerenge			1			1
149	Panicum maximum								1
150	Pappea capensis		Umuremampongo						1
151	Parietaria debilis															1												1
152	Parinari curatellifolia		Umunazi						1
153	Parinari excelsa																									1
154	Paulinia pinnata		Umunyakagongo						1
155	Pavetta ternifolia		Umumenamabuye								1												1
156	Peddiea rapaneoides		Umusine																								1					1
157	Pelargonium graveolense	Geranium							1
158	Pentadesma reyndersii		Umwasa, urushehe	E																		1		1		1			1		1
159	Pentas lanceolata															1												1
160	Pentas zanzibarica var. rubra															1												1
161	Pericopsis angolensis		Umubaga						1
162	Phoenix reclinata		Umukindo						1																				1
163	Piliostigma thonningii		Ikidahotorwa, Igikongwa						1
164	Pittosporum mildbraedii																										1
165	Pittosporum spathicalyx		Umukuyu, Umuhisyi							1													1
166	Platylepis glandulosa								1
167	Polyscias fulva		Umwungo																							1
168	Polystachya sp.								1				1			1												1		1
169	Prunus africana	Red stinkwood	Umwumba, Umujuga	E	CITES					1
170	Psychotria mahonii		Ikiryoheramuhoro, Umugaja																		1						1					1
171	Psydrax parviflora		Umubaruka, Umugomera																								1					1
172	Psydrax schimperiana		Umukiragi, Umunyarutete			1
173	Pterygota mildbraedii	Mubende witch tree	Umuguruka	CE						1													1
174	Ranunculus bequaertii															1												1
175	Rapanea melanophroides		Uruneke																								1					1
176	Rhipidoglossum bilobatum																										1	1		1		1
177	Rhoicissus revoilii		Umumara																										1
178	Rhoicissus tridentata								1
179	Rhus natalensis		Umusagara			1			1							1										1			1
180	Rhus vulgaris		Umusagara, Umuvumburankwavu						1																				1
181	Rumex bequartii		Nyiramuko													1												1
182	Rytiginia kigeziensis																										1					1
183	Rytigynia bugoyensis																										1	1		1		1
184	Sapium ellipticum		Umushashi, Umusurirabakonzi						1
185	Scadoxus multiflorus								1
186	Scutia myrtina		Umugasa, Umunyarutete			1
187	Securidaca longepedunculata		Umunyagasozi						1
188	Senna spectabilis																												1
189	Sensevieria cylindrica								1
190	Sercostachys scandens		Umukipfu																		1
191	Smithia elliotii var. elliotii															1												1
192	Sporobolus pyramidalis					1
193	Sterculia tragacantha	African tragacantha	Igikungwe	E																											1
194	Stolziasp												1			1												1		1
195	Strombosia scheffleri	Strombosia	Umushyika	E																											1
196	Strychmos (strychnos) lucens		Umuhonnyo																											1
197	Symphonia globulifera	Symphonia, Boarwood	Umushishi	E																							1	1		1		1
198	Syzigium guinnense																									1
199	Syzygium cordatum		Umugote						1
200	Syzygium guineense		Umugote																							1	1				1	1
201	Syzygium parvifolium		Umugote																								1
202	Tabernaemontana odoratissima			E																		1		1		1			1		1
203	Tabernaemontana stapfiana		Umuronzi, Umubaribari																		1
204	Tacazzea floribunda								1
205	Tapinanthus myrsinifolius		Ingurukizi						1
206	Teclea nobilis								1
207	Themeda triandra					1
208	Tithonia diversitfolia					1
209	Tridactyle anthomaniana								1	1
210	Trimeria grandiflora		Umusabanyama, Umunyarubobi						1
211	Vaccinium stanleyi			VU																		1		1		1			1		1
212	Vangueria volkensii									1													1
213	Vepris nobilis		Umuzo			1
214	Vernonia auriculifera		Igaragara	CE																							1	1		1		1
215	Vernonia kirungae															1												1
216	Vernonia lasiopsis		Ivumo																								1					1
217	Vittaria reekmansii																										1	1		1		1
218	Ximenia caffra		Umusasa			1
219	Xymalos monospora		Umuhotora																								1					1
220	Xyris vallida			CE									1			1						1		1		1		1	1	1	1
221	Zanthoxylum chalybeum	Knobwood	Intareyirungu	E			1	1			1
Total						36	9	9	64	9	13	0	16	0	0	27	0	0	1	0	19	17	11	17	0	27	41	41	35	32	33	32	0	0	0
CE				7
E				25
VU				6
CITES					2

## Sheet: M
DISTR_NAME	Mammals
Bugesera	3
Gatsibo	32
Kayonza	32
Kirehe	8
Ngoma	1
Nyagatare	32
Rwamagana	0
Burera	13
Gakenke	0
Gicumbi	0
Musanze	25
Rulindo	0
Gisagara	0
Huye	1
Kamonyi	0
Muhanga	5
Nyamagabe	99
Nyanza	1
Nyaruguru	99
Ruhango	0
Karongi	100
Ngororero	13
Nyabihu	29
Nyamasheke	99
Rubavu	16
Rusizi	99
Rutsiro	13
Kicukiro	0
Gasabo	0
Nyarugenge	0

## Sheet: B
DISTR_NAME	Birds
Bugesera	17
Gatsibo	59
Kayonza	59
Kirehe	53
Ngoma	6
Nyagatare	61
Rwamagana	0
Burera	34
Gakenke	0
Gicumbi	0
Musanze	5
Rulindo	0
Gisagara	0
Huye	0
Kamonyi	0
Muhanga	0
Nyamagabe	300
Nyanza	1
Nyaruguru	300
Ruhango	0
Karongi	301
Ngororero	44
Nyabihu	36
Nyamasheke	304
Rubavu	39
Rusizi	300
Rutsiro	46
Kicukiro	1
Gasabo	1
Nyarugenge	4

## Sheet: F
DISTR_NAME	Fish
Bugesera	15
Gatsibo	0
Kayonza	0
Kirehe	15
Ngoma	15
Nyagatare	0
Rwamagana	0
Burera	0
Gakenke	0
Gicumbi	0
Musanze	0
Rulindo	0
Gisagara	0
Huye	0
Kamonyi	0
Muhanga	0
Nyamagabe	0
Nyanza	0
Nyaruguru	0
Ruhango	0
Karongi	1
Ngororero	0
Nyabihu	0
Nyamasheke	1
Rubavu	1
Rusizi	1
Rutsiro	1
Kicukiro	0
Gasabo	0
Nyarugenge	0

## Sheet: R
DISTR_NAME	Reptiles
Bugesera	9
Gatsibo	13
Kayonza	13
Kirehe	15
Ngoma	8
Nyagatare	16
Rwamagana	6
Burera	4
Gakenke	0
Gicumbi	0
Musanze	3
Rulindo	0
Gisagara	0
Huye	0
Kamonyi	0
Muhanga	2
Nyamagabe	12
Nyanza	0
Nyaruguru	1
Ruhango	0
Karongi	14
Ngororero	0
Nyabihu	2
Nyamasheke	14
Rubavu	3
Rusizi	4
Rutsiro	3
Kicukiro	0
Gasabo	0
Nyarugenge	0

[truncated: 3 more sheets: A, P, Total]
